# Supplementary material for: The Complete Mitochondrial Genome of the Damsel Bug Alloeorhynchus bakeri (Hemiptera: Nabidae)
Source: PubMed Central journal article supplement — Int J Biol Sci. 2011 Nov 24;8(1):93–107. doi: 10.7150/ijbs.8.93 (PMC3248651; doi:10.7150/ijbs.8.93), 2011-11-24
Supplement: ijbsv08p0093s1.pdf [file ijbsv08p0093s1.pdf]

## SUPPLEMENTARY MATERIALS

**Table S1: Primer sequences used in this study**

| No. of fragment <sup>a</sup> | Primer name | Nucleotide sequence (5'-3') | Reference          |
|------------------------------|-------------|-----------------------------|--------------------|
| 1                            | TM-J210     | AATTAAGCTATTAGGTTTCATACCC   | Simon et al., 2006 |
|                              | TW-N1284    | TTAACTTTGAAGGTTAATAGTTT     | Simon et al., 2006 |
| 2                            | F-1284      | CTCAAAATGAAAATCACCC         | Present study      |
|                              | R-1301      | GCTCATAGTCCGAAGATAA         | Present study      |
| 3                            | TW-J1301    | GTTAAATAAACTATTAACCTTCAAA   | Simon et al., 2006 |
|                              | C1-N1738    | TTTATTTCGAGGGAATGCTATATC    | Simon et al., 2006 |
| 4                            | F-1718      | GTTACAGCACACGCCTT           | Present study      |
|                              | R-1738      | TCAACATCTATTCCCCTG          | Present study      |
| 5                            | C1-J1718    | GGAGGATTTGGAAATTGATTAGTTCC  | Simon et al., 2006 |
|                              | C1-N2191    | CCCGGTAAAATTTAAAATATAAACTTC | Simon et al., 2006 |
| 6                            | F-2191      | TGCCAAACGGCAAGTATTATTCCC    | Present study      |
|                              | R-3790      | GGCCTGTTCTAGGGTCAAAGGT      | Present study      |
| 7                            | TK-J3790    | CATTAAGTGACTGAAAGCAAGTA     | Simon et al., 2006 |
|                              | A6-N4552    | ATGACCTGCAATTATATTAGC       | Simon et al., 2006 |
| 8                            | F-4552      | TAGCCACCTAATCCCAC           | Present study      |
|                              | R-7077      | CTGTGCGGGCATTATTATTC        | Present study      |
| 9                            | N5-J7077    | TTAAATCCTTTTGAGTAAAATCC     | Simon et al., 2006 |
|                              | N5-N7793    | TTAGGTTGAGATGGTTTAGG        | Simon et al., 2006 |
| 10                           | N5-J7572    | AAAGGGAATTTGAGCTCTTTTWTG    | Simon et al., 2006 |
|                              | N4-N8727    | AAATCTTTRATTGCTTATTCWTC     | Simon et al., 2006 |
| 11                           | F-8727      | CACCCACAAGATTCAAGGT         | Present study      |
|                              | R-10933     | GGAAGGGCAATAGAAAAGTGT       | Present study      |
| 12                           | CB-J10933   | GGACGWGGWATTTATTATGGATC     | Simon et al., 2006 |
|                              | CB-N11526   | ATTACTCCTCTAGCTTATTAGGAATTG | Simon et al., 2006 |
| 13                           | CB-J11335   | CATATTCAACCAGAATGATA        | Simon et al., 2006 |
|                              | N1-N12067   | AATCGTTCCTCATTGATTTTGC      | Simon et al., 2006 |
| 14                           | N1-J11876   | CGAGGTAAAGTACCACGTACTCA     | Simon et al., 2006 |
|                              | N1-N12595   | GTTGGATTTCTAACTTTATTRGARCG  | Simon et al., 2006 |
| 15                           | N1-J12261   | TACCTCATAAGAAATAGTTTGAGC    | Simon et al., 2006 |
|                              | LR-N13000   | TTACCTTAGGGATAACAGCGTAA     | Simon et al., 2006 |
| 16                           | LR-J12888   | CCGGTCTGAACTCAGATCATGTA     | Simon et al., 2006 |
|                              | LR-N13889   | ATTTATTGTACCTTTTGTATCAG     | Simon et al., 2006 |
| 17                           | LR-J13342   | CCTTAGCACAGTTAAAATACTGC     | Simon et al., 2006 |
|                              | SR-N14220   | TTATGCACATATCGCCCGTC        | Simon et al., 2006 |
| 18                           | F-14197     | AGAAGAGCTAATCCCCCTCTACCT    | Present study      |
|                              | R-14220     | TCCAGAGGAACCTGCCCTGT        | Present study      |
| 19                           | SR-J14197   | GTAAYCTACTTTGTACGACTT       | Simon et al., 2006 |
|                              | SR-N14745   | GTGCCAGCAAYCGCGGTTATAC      | Simon et al., 2006 |
| 20                           | F-14745     | AAGCGACGGGCGATATGTGCATAAT   | Present study      |
|                              | R-210       | GAAATGGGGGAGTGCCGGTTTAAT    | Present study      |

<sup>a</sup>The orientation is as shown in Fig. 1.
